# Supplementary material for: Regular Sport Activity Is Able to Reduce the Level of Genomic Damage
Source: Preprints.org preprint supplement (doi:10.20944/preprints202306.2201.v1), 2023-06-30
Supplement: Supplementary file 3 [file supplementary]

Supplementary Material 1 – Gene Polymorphisms, Reference Sequence (rs) numbers, Primers, annealing temperatures and genotypig methodologies used

| Gene Symbols | Studied polymorphisms | Polymorphism NCBI | Primer sequence | T  (°C) | Methodology | PRC Product  size (bp) | References |
| --- | --- | --- | --- | --- | --- | --- | --- |
| *CYP1A1*  *exon 7* | (A>G) (Ile462Val) | rs1048943 | 5′- AAGACCTCCCAGCGGGCAAT - 3′  5′- AAGACCTCCCAGCGGGCAAC - 3′  5′- CTCTGGTTACAGGAAGCTAT - 3′ | 60 | ARMS-PCR | 162 | (Chen et al., 2001) |
| *GSTM1* | Presence/absence | rs1183423000 | 5- CTGGATTGTAGCAGATCATGC - 3’  5’- CTGCCCTACTTGATTGATGGG - 3’ | 65 | PCR | 273 | (Zhong et al., 1993) |
| *GSTT1* | Presence/Absence | rs1601993659 | 5’- TTCCTTACTGGTCCTCACATCTC - 3’  5’- TCACCGGATCATGGCCAGCA - 3’ | 63 | PCR | 480 | (Pemble et al., 1994) |
| *XRCC1* | (C>T) (Arg194Trp) | rs1799782 | 5’- GCCCCGTCCCAGGTA – 3’  5’- AGCCCCAAGACCCTTTCACT - 3’ | 60 | RFLP  (MspI) | Undigested Product: 383 bp  C-allele = 346 + 37 bp  T-allele = 383 bp | (Wang et al., 2010) |
| *XPC*  *exon 15* | (A>C) (Lys939Gln) | rs2228001 | 5’ – ACCAGCTCTCAAGCAGAAGC – 3’  5’ – CTGCCTCAGTTTGCCTTCTC – 3’ | 60 | RFLP  (Pvu II) | Undigestyed Product: 281 bp  A-allele = 281  C-allele = 150+131 bp | (Hu et al., 2005) |

**References**

1. Chen, S., Xue, K., Xu, L., Ma, G., Wu, J. Polymorphisms of the CYP1A1 and GSTM1 genes in relation to individual susceptibility to lung carcinoma in Chinese population. *Mutat. Res*. **2001**, 458, 41-47.
2. Hu, Z., Wang, Y., Wang, X. Liang, G., Miao, X., Xu, Y., Tan, W., Wei, Q., Lin, D., Shen, H. DNA repair gene XPC genotypes/haplotypes and risk of lung cancer in a Chinese population. *Int. J. Cancer* **2005**, 115(3), 478-83.
3. Pemble, S., Schroeder, K.R., Spencer, S.R., Meyer, D.J., Hallier, E., Bolt, H.M., Ketterer, B., Taylo,r J.B. Human glutathione S-transferase theta (GSTT1): cDNA cloning and the characterization of a genetic polymorphism. *Biochem. J.* **1994**, 300, 271-276.
4. Wang, Q., Ji, F., Sun, Y., Qui, Y.L., Wang, W., Wu, F., Miao, W., Li, Y., Brandt-Rauf, P.W., Xia, Z. Genetic polymorphisms of XRCC1, HOGG1 and MGMT and micronucleus occurrence in Chinese vinyl chloride-exposed workers. *Carcinogenesis* **2010**, 31(6), 1068-1073.
5. Zhong, S., Wyllie, A.H., Barnes, D., Wolf, C.R., Spurr, N.K. Relationship between GSTM1 genetic polymorphism and susceptibility to bladder, breast and colon cancer. *Carcinogenesis* **1993**, 14, 1821-1824.
